# Supplementary material for: Changes in Sleep Difficulties During the Transition to Statutory Retirement
Source: Oxford University Press journal article supplement (doi:10.1093/sleep/zsx182), 2017-11-16
Supplement: zsx182_suppl_figure_s1.pdf [file zsx182_suppl_figure_s1.pdf]

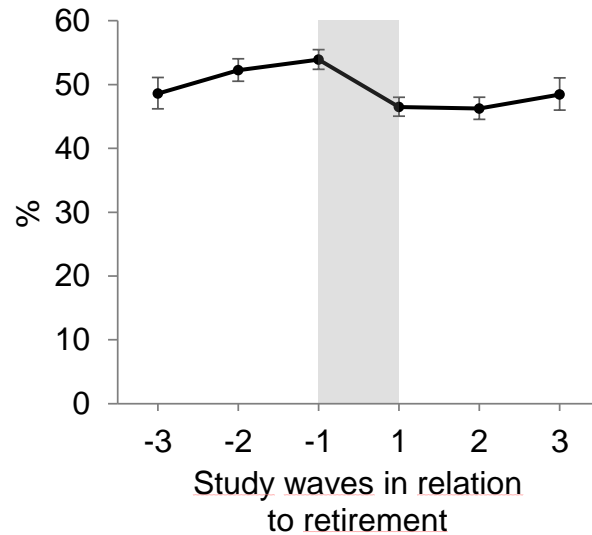

**Figure S1** – Sleep difficulties in relation to retirement, when the minimum limit for the occurrence of any sleep difficulty is set as two nights per week. Prevalence of any sleep difficulty in each study wave and the 95% confidence interval derived from log-binominal regression analyses with generalized estimating equations. Time between each study wave is approximately four years. Adjusted for gender, retirement age and occupational status. The period of the retirement transition is shown in grey.
