# Supplementary material for: Changes in Sleep Difficulties During the Transition to Statutory Retirement
Source: Oxford University Press journal article supplement (doi:10.1093/sleep/zsx182), 2017-11-16
Supplement: zsx182_suppl_figure_s2.pdf [file zsx182_suppl_figure_s2.pdf]

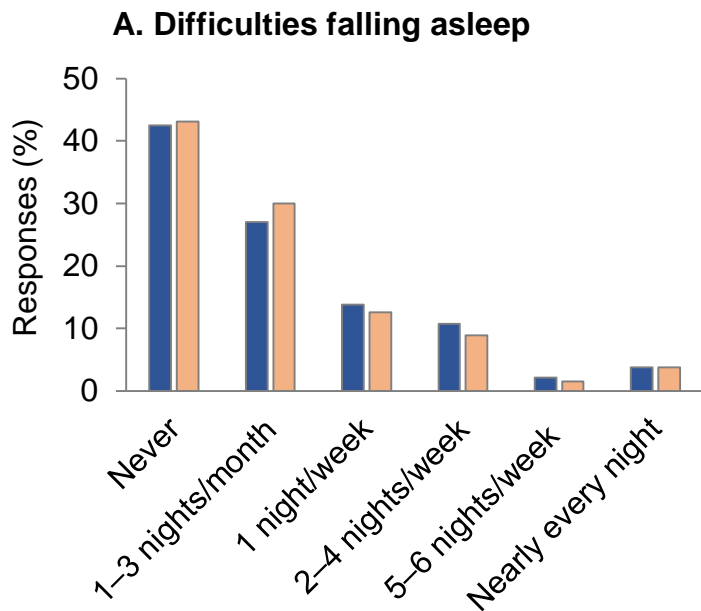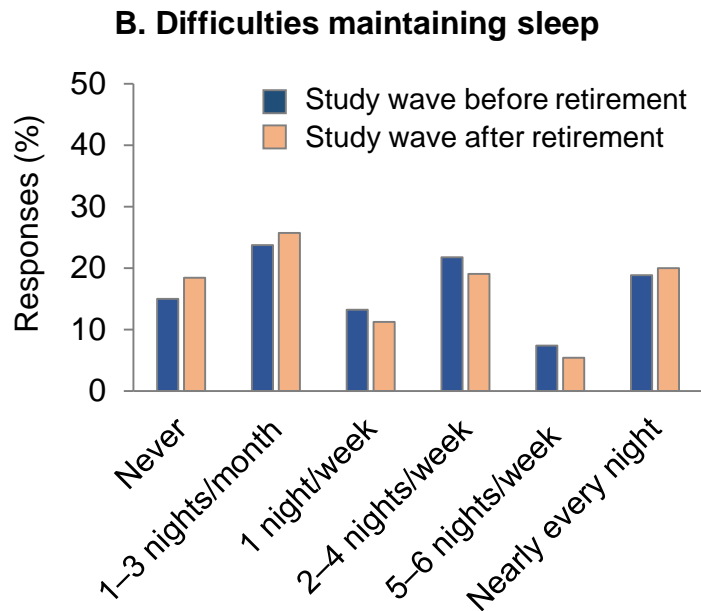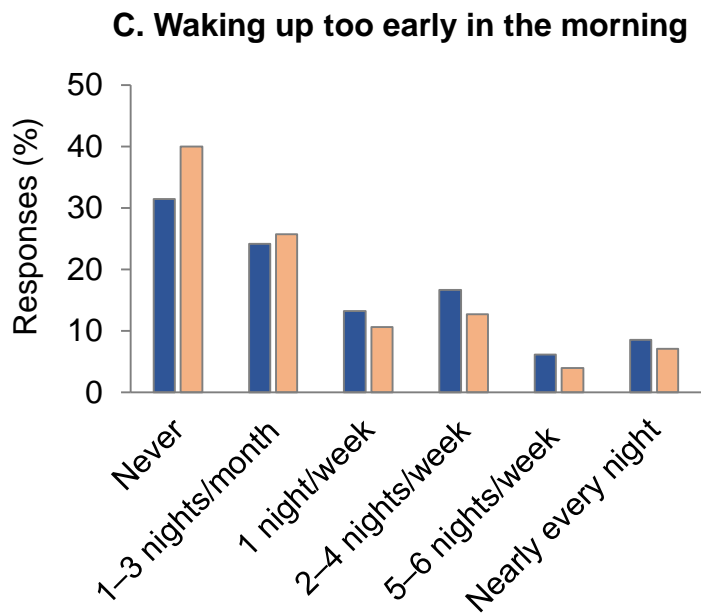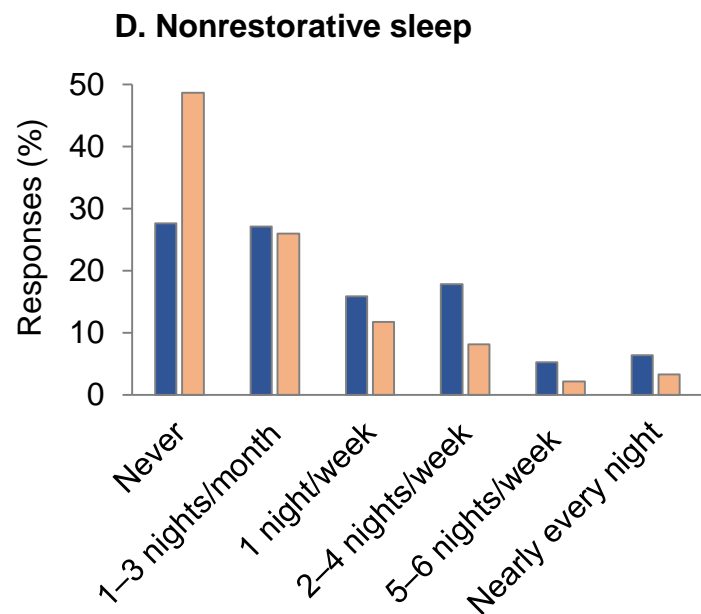

**Figure S2** – Comparisons of distributions of responses to questions about the occurrence of specific types of sleep difficulties in the study wave immediately before retirement (wave<sub>-1</sub>) and in the study wave immediately after retirement (wave<sub>+1</sub>)
