# Supplementary material for: Changes in Sleep Difficulties During the Transition to Statutory Retirement
Source: Oxford University Press journal article supplement (doi:10.1093/sleep/zsx182), 2017-11-16
Supplement: zsx182_suppl_table_s1.pdf [file zsx182_suppl_table_s1.pdf]

**Table S1** – Study design. Survey years, their relation to the study waves around retirement and the construction of the pre-retirement, retirement transition and post-retirement periods.

| Pre-retirement period |                 | Retirement transition |            | Post-retirement period |                 |                 |
|-----------------------|-----------------|-----------------------|------------|------------------------|-----------------|-----------------|
| wave-3                | wave-2          | wave-1                | RETIREMENT | wave+1                 | wave+2          | wave+3          |
| <i>n</i> =1,483       | <i>n</i> =3,687 | <i>n</i> =5,807       |            | <i>n</i> =5,807        | <i>n</i> =3,414 | <i>n</i> =1,258 |
|                       |                 | 2000-2002             |            | 2005                   | 2009            | 2013            |
|                       | 2000-2002       | 2004                  |            | 2009                   | 2013            |                 |
| 2000-2002             | 2004            | 2008                  |            | 2013                   |                 |                 |
